# 1    **The structural basis of the oncogenic mutant K-**

## 2    **Ras4B homodimers**

3

4    **Kayra Kosoglu<sup>1</sup>, Meltem Eda Omur<sup>1</sup>, Hyunbum Jang<sup>2</sup>, Ruth Nussinov<sup>2,3</sup>, Ozlem**  
5    **Keskin<sup>4\*</sup>, Attila Gursoy<sup>5</sup>**

6

7    <sup>1</sup> Department of Molecular Biology and Genetics, Koc University, Rumelifeneri Yolu, 34450  
8    Sariyer Istanbul, Turkey.

9    <sup>2</sup> Computational Structural Biology Section, Frederick National Laboratory for Cancer  
10    Research, National Cancer Institute at Frederick, Frederick, MD 21702, U.S.A.

11    <sup>3</sup> Department of Human Molecular Genetics and Biochemistry, Sackler School of Medicine,  
12    Tel Aviv University, Tel Aviv 69978, Israel

13    <sup>4</sup> Department of Chemical and Biological Engineering, Koc University, Rumelifeneri Yolu,  
14    34450 Sariyer Istanbul, Turkey

15    <sup>5</sup> Department of Computer Engineering, Koc University, Rumelifeneri Yolu, 34450 Sariyer  
16    Istanbul, Turkey

17

18    **\* Corresponding author**

19    E-mail: [okeskin@ku.edu.tr](mailto:okeskin@ku.edu.tr) (OK)

20

21    **Current address for MEO:** Vancouver Prostate Centre, University of British Columbia,  
22    Vancouver V6H 3Z6, Canada

23

## 24 **Abstract**

25           Ras proteins activate their effectors through physical interactions in response to the  
26 various extracellular stimuli at the plasma membrane. Oncogenic Ras forms dimer and  
27 nanoclusters at the plasma membrane, boosting the downstream MAPK signal. It was  
28 reported that K-Ras4B can dimerize through two major interfaces: (i) the effector lobe  
29 interface, mapped to Switch I and effector binding regions; (ii) the allosteric lobe interface  
30 involving  $\alpha 3$  and  $\alpha 4$  helices. Recent experiments showed that constitutively active, oncogenic  
31 mutant K-Ras4B<sup>G12D</sup> dimers are enriched in the plasma membrane. Here, we perform  
32 molecular dynamics simulations of K-Ras4B<sup>G12D</sup> homodimers aiming to quantify the two  
33 major interfaces in atomic level. To examine the effect of mutations on dimerization, two  
34 double mutations, K101D/R102E on the allosteric lobe and R41E/K42D on the effector lobe  
35 interfaces were added to the K-Ras4B<sup>G12D</sup> dimer simulations. We observed that the effector  
36 lobe K-Ras4B<sup>G12D</sup> dimer is stable, while the allosteric lobe dimer alters its helical interface  
37 during the simulations, presenting multiple conformations. The K101D/R102E mutations  
38 slightly weakens the allosteric lobe interface. However, the R41E/K42D mutations disrupt the  
39 effector lobe interface. Using the homo-oligomers prediction server, we obtained trimeric,  
40 tetrameric, and pentameric complexes with the allosteric lobe K-Ras4B<sup>G12D</sup> dimers. However,  
41 the allosteric lobe dimer with the K101D/R102E mutations is not capable of generating  
42 multiple higher order structures. Our detailed interface analysis may help to develop inhibitor  
43 design targeting functional Ras dimerization and high order oligomerization at the membrane  
44 signaling platform.

45

46

## 47 **Introduction**

48           Ras proteins are small GTPases which couple cell-surface receptors to downstream  
49 effectors regulating various cellular processes including cell cycle progression, cell  
50 differentiation and survival, cytoskeletal organization, cell polarity and movement, and  
51 vesicular and nuclear transport. Ras proteins cycle between two conformations: inactive GDP-  
52 bound and active GTP-bound forms [1, 2]. The extracellular stimuli lead to the activation of a  
53 regulatory protein, guanine nucleotide exchange factor (GEF). GEFs induce the release of  
54 guanosine diphosphate (GDP) from Ras and permits binding of guanosine triphosphate (GTP)  
55 [3, 4]. Upon GTP binding, a conformational change occurs in downstream effector binding  
56 region which allows the interaction of Ras with its effector proteins including Raf kinase,  
57 phosphatidylinositol 3-kinase (PI3K), and Ral guanine nucleotide dissociation stimulator  
58 (RalGDS) [5-8]. The activity of Ras is downregulated by GTPase activating proteins (GAPs).  
59 Ras proteins have intrinsic GTPase activity, which means that they can hydrolyze GTP to  
60 GDP. This hydrolysis reaction is extremely slow [2]. GAPs induce the GTPase activity of  
61 Ras, thereby accelerates the process. Ras mutations that impair GTPase activity are  
62 insensitive to GAPs, rendering mutant Ras proteins persistent in their active GTP-bound state,  
63 thereby prolonging downstream signaling associated with oncogenic cell growth [3, 4].

64           The three human Ras genes encode highly similar proteins: H-Ras, N-Ras and K-Ras.  
65 The two K-Ras proteins arise from alternative splicing at their C-termini: K-Ras4A and K-  
66 Ras4B [9]. All have 189 amino acids except K-Ras4B that has 188 amino acids. The catalytic  
67 domain contains functional P-loop (residues 10-17), Switch I (residues 30-38), and Switch II  
68 (residues 60-76) regions, which are responsible for GTP hydrolysis and effector binding.  
69 Upon dissociation of GDP and subsequent GTP binding, the conformational change is  
70 observed in two regions of Ras; Switch I and Switch II. Switch I is responsible for interaction  
71 with GAP and other effector proteins, while Switch II is involved in GEF binding. While the

72 catalytic domain (residues 1-166) of the four isoforms have high identity among each other (~  
73 89%), the hypervariable region (HVR) of the four isoforms has low sequence identity (~ 8%)  
74 (**Fig 1**) [10]. Despite being highly homologous, these isoforms may prefer different binding  
75 partners, and have unique physiological functions [11]. K-Ras4B is confirmed as the most  
76 frequently mutated isoform in *RAS*-driven cancers (86%), while N-Ras (11%) and H-Ras  
77 (3%) are accordingly less mutated isoforms from The Catalog of Somatic Mutations in Cancer  
78 (COSMIC) [12]. 98% of oncogenic Ras have amino acid mutations at the active site residues  
79 G12, G13, and Q61 [1, 11, 13]. The mutation frequencies vary in K-Ras4B. G12 is the most  
80 frequently mutated residue (89%), followed by G13 (9%) and Q61 (1%) residues [14]. G12  
81 most frequently mutates to aspartic acid, G12D (36%), among three frequent mutations G12C  
82 (14%) and G12V (23%) [9]. These mutations at conserved sites impair the intrinsic and GAP  
83 catalyzed hydrolysis of GTP [15, 16].

84

85 **Fig 1. Comparison between Ras isoforms.** Sequence similarity of the Ras catalytic domain  
86 via multiple sequence alignment of four Ras isoform proteins.

87

88 Ras proteins have been defined as monomeric GTPases for a long time. Several  
89 studies have provided compelling evidences for existence of their higher order structures [17-  
90 25]. Nanoclusters of receptors in cell membranes have been known for a while. N-Ras-GDP  
91 was found to form dimers in a model membrane [26]. H-Ras could dimerize on membrane  
92 surfaces, and the Switch II region was involved in the dimerization [27]. The Raf kinases are  
93 important molecules in Ras signaling pathway. It is known that Raf dimerization plays a  
94 critical role in Ras dependent Raf activation [17, 28, 29]. Raf proteins are recruited to the cell  
95 membrane upon Ras activation [22, 29-31]. Accordingly, the recruitment results in  
96 dephosphorylation of inhibitory sites and the phosphorylation of activating sites within kinase

97 domain. It is believed that Ras dimerization contributes to Raf dimerization and Raf activation  
98 [29, 32]. Spencer-Smith *et al.* [33] showed that a synthetic monoclonal protein, binding to the  
99  $\alpha 4$ - $\beta 6$ - $\alpha 5$  region of H-Ras and K-Ras disrupting Ras dimerization. Ambrogio *et al.* showed  
100 that dimerization was required to maintain the oncogenic function of mutant K-Ras [34]. We  
101 recently showed that K-Ras4B can form stable dimers through allosteric lobe and this  
102 dimerization enhances but not necessary for downstream signaling [19-22]. Despite all these  
103 efforts, the mechanism how K-Ras4B dimerizes and promotes Raf activation is yet to be  
104 discovered.

105 We have previously showed that wild-type K-Ras4B can form homodimers through  
106 both allosteric and effector lobe dimer interfaces *in silico* and *in vitro* [19-22]. The allosteric  
107 lobe dimer interface involves  $\alpha 3$  and  $\alpha 4$  helices (hereafter referred to as  $\alpha$ -homodimer), while  
108 the effector lobe dimer interface contains a shifted  $\beta$ -sheet extension between  $\beta 2$  strands  
109 (hereafter referred to as  $\beta$ -homodimer) (**Fig 2**). In this study, we adopted both homodimer  
110 interfaces from wild-type K-Ras4B dimers and introduced the oncogenic G12D mutation to  
111 K-Ras4B dimers. Explicit molecular dynamics (MD) simulations were performed on  
112 oncogenic mutant K-Ras4B<sup>G12D</sup>  $\alpha$ -homodimer containing the  $\alpha 3$  and  $\alpha 4$  helical interface and  
113  $\beta$ -homodimer assembled through a shifted  $\beta$ -sheet extension. To test stability of the oncogenic  
114 dimers, we applied two double mutations, K101D/R102E on the  $\alpha$ -homodimer interface and  
115 R41E/K42D on the  $\beta$ -homodimer interface studied in previous experiments [20], to the  
116 oncogenic dimer model systems. Two additional mutant systems, K-Ras4B<sup>G12D/K101D/R102E</sup>  $\alpha$ -  
117 homodimer (hereafter referred to as mutant  $\alpha$ -homodimer) and K-Ras4B<sup>G12D/R41E/K42D</sup>  
118 (hereafter referred to as mutant  $\beta$ -homodimer) were also subject to explicit MD simulations in  
119 solution. Presumably, we expect that the charge converted mutations at the dimeric interface  
120 directly interfere with the dimer association. In our simulations, we observed that both  
121 oncogenic K-Ras4B<sup>G12D</sup>  $\alpha$ - and  $\beta$ -homodimers are stable, with the oncogenic  $\beta$ -homodimer

122 being more stable than the oncogenic  $\alpha$ -homodimer, consistent with our previous study of the  
123 wild-type K-Ras4B dimer systems [19, 21]. However, the double mutations R41E/K42D  
124 introduced in the effector lobe interface are more disruptive than the double mutations  
125 K101D/R102E in the allosteric lobe interface. Both mutant  $\alpha$ - and  $\beta$ -homodimers are less  
126 stable than the oncogenic homodimers, being prone to interrupt dimer association.

127

128 **Fig 2. Structure of K-Ras4B homodimers and interface residues.** The K-Ras4B  $\alpha$ -  
129 homodimer involving the symmetric  $\alpha 3$ - $\alpha 4$ / $\alpha 3$ - $\alpha 4$  helical alignment (upper row) and the  $\beta$ -  
130 homodimer containing a shifted  $\beta$ -sheet extension between  $\beta 2$  strands (lower row).

131

## 132 **Materials and methods**

### 133 **Computational prediction of K-Ras4B dimers**

134 The dimeric structures of the K-Ras4B were modeled by PRISM [38-40], which is a  
135 template-based protein-protein structure prediction algorithm. The outputs of PRISM were  
136 ranked based on the binding energy scores (BES). The GTP-bound K-Ras4B structure was  
137 obtained from the Protein Data Bank (PDB) (PDB ID: 3GFT). Then, the interface regions of  
138 the predicted dimers were identified by HotRegion which also gives the predicted hot spot  
139 clusters [41]. HotRegion identifies the important regions for the stability of protein-protein  
140 complexes.

141

### 142 **Determination of the residues to be mutated**

143 The atomic interactions of K-Ras4B homodimers in the GTP-bound state were  
144 investigated to the interface residues to be mutated. The change in binding free energy ( $\Delta\Delta G$ )  
145 upon mutations was calculated by FoldX which estimates the stability effect of a mutation by

146 using an empirical method [42]. If the energy value of a mutation is  $\Delta\Delta G > 0$  kcal/mol, then  
147 that mutation will destabilize the structure, if the reverse effect is obtained then that mutation  
148 will stabilize the structure.

149

## 150 **Atomistic MD simulations**

151 A total of four initial configurations, two  $\alpha$ -homodimers and two  $\beta$ -homodimers of K-  
152 Ras4B-GTP, were subjected to the MD simulations. Our simulations closely followed the  
153 protocol reported in previous studies [21, 22, 43-45]. All-atom additive CHARMM36 force  
154 field [46] was used, and simulations were performed by NAMD [47]. Each system was run  
155 for 300 ns resulting in a total of 1.2  $\mu$ s MD simulations. K-Ras4B control and mutant systems  
156 were neutralized by addition of 56 Na<sup>+</sup> and 40 Cl<sup>-</sup>, 64 Na<sup>+</sup> and 40 Cl<sup>-</sup> ions, respectively. Mg<sup>2+</sup>  
157 ions are kept. Our protein complexes were simulated in  $90 \times 90 \times 90$  Å<sup>3</sup> virtual water boxes  
158 created by using TIP3P explicit solvent model [48]. Before production runs, 10,000 steps of  
159 minimization and 50,000 steps of dynamics runs were applied to our system. Dynamics were  
160 run under NPT ensemble. The step size was 2 fs. To calculate the long-range electrostatic  
161 interaction, particle mesh Ewald (PME) method was used. In the production runs, the  
162 Langevin temperature control maintained the constant temperature at 310 K, and the pressure  
163 was kept at 1 atm. The simulated trajectories were analyzed using CHARMM [49] and  
164 Chimera [50].

165

## 166 **Binding free energy calculation for the Ras dimers**

167 To investigate the strengths of the interactions within the systems, we calculated  
168 binding free energies using the molecular mechanics energies combined with the generalized  
169 Born (GB) and surface area continuum solvation (MM-GBSA) method [51]. The average of  
170 gas-phase and solvation free energy values were taken throughout 300 ns simulations. The

171 calculations were performed by CHARMM36 programming program. The average binding  
172 free energy is formulated as a sum of the gas phase contribution, the solvation energy  
173 contribution and the entropic contribution which is shown as:

$$174 \Delta G = \Delta G_{gas} + \Delta G_{sol} - T\Delta S. \quad (1)$$

176  
177 The change in binding energy was calculated with the following formula for K-Ras4B dimer  
178 systems:

$$179 \Delta G_b = \Delta G_b^{dimer} - (\Delta G_b^{monomer1} + \Delta G_b^{monomer2}). \quad (2)$$

181

## 182 **Results**

### 183 **Selection of the mutant K-Ras4B dimeric systems**

184 In the initial structures of  $\alpha$ - and  $\beta$ -homodimer models generated by PRISM, we  
185 extracted the interface residues (**Table 1**) and defined the most critical residues with their  
186 corresponding energy scores calculated by FoldX for both interfaces (**Table 2**). These results  
187 show that some residues are more critical in dimerization. I21, I24, Q25, H27, Y40, and R41  
188 are found to be computational hot spots at the  $\beta$ -homodimer, and H94, R97, L133, S136, and  
189 Y137 are found to be computational hot spots at the  $\alpha$ -homodimer interfaces according to  
190 HotRegion. Based on our previous studies [19, 20], we selected E98R, K101A/R102A, and  
191 K101D/R102E mutations on the allosteric lobe interface, and S39/Y40A, R41A/K42A, and  
192 R41E/K42D mutations on the effector lobe interface. In our previous studies [20], we tested  
193 these mutants *in vitro* using the Bimolecular fluorescence complementation (BiFC) system,  
194 investigating the Ras-Ras interactions in HEK293T cells. When there was an interaction



195 between Ras proteins, a strong fluorescence signal was expected. The signals were mainly  
196 around the plasma membrane where K-Ras4B was located, suggesting the K-Ras4B proteins  
197 interact. The cells expressing K101D/R102E double mutants (on top of G12D) yielded less  
198 fluorescence signals compared to the cells expressing solely (K-Ras4B<sup>G12D</sup>), suggesting that  
199 K101/R102 residues play a role in interaction between K-Ras4B proteins [20]. According to  
200 our BiFC experiments, we selected two mutations with opposite charge, K101D/R102E for  
201 the allosteric lobe interface and R41E/K42D, for the effector lobe interface, and introduced  
202 them to the oncogenic KRas4B<sup>G12D</sup>  $\alpha$ - and  $\beta$ -homodimers, respectively. There were four  
203 simulation systems containing two allosteric lobe interface dimers, oncogenic K-Ras4B<sup>G12D</sup>  
204 and mutant K-Ras4B<sup>G12D/K101D/R102E</sup>  $\alpha$ -homodimers, and two effector lobe interface dimers,  
205 oncogenic K-Ras4B<sup>G12D</sup> and mutant K-Ras4B<sup>G12D/R41E/K42D</sup>  $\beta$ -homodimers.

206

207 **Table 1. Interface residues defined in the  $\alpha$ - and  $\beta$ -homodimer structures.**

| K-Ras4B-GTP         | Interface residues                                                                  |
|---------------------|-------------------------------------------------------------------------------------|
| $\alpha$ -homodimer | E91, H94, H95, R97, E98, K101, R102, D105, S106, E107, K128, L133, R135, S136, Y137 |
| $\beta$ -homodimer  | I21, I24, Q25, H27, V29, E31, D33, I36, E37, D38, S39, Y40, R41, K42, Q43, L52      |

212

213

214

215

216

217

218 **Table 2. K-Ras4B dimer binding free energy calculation by FoldX.**

| 219 | <b>K-Ras4B-GTP</b>                   | <b>Mutations</b> | <b><math>\Delta\Delta G</math> (kcal/mol)</b> |
|-----|--------------------------------------|------------------|-----------------------------------------------|
| 220 | <b><math>\beta</math>-homodimer</b>  | S39A             | 0.0756                                        |
| 221 |                                      | Y40A             | 3.001                                         |
| 222 |                                      | S39A/Y40A        | 3.069                                         |
| 223 |                                      | R41E             | 9.931                                         |
| 224 |                                      | K42D             | 5.288                                         |
| 225 |                                      | R41E/K42D        | 15.894                                        |
| 226 |                                      | R41A             | 3.251                                         |
| 227 |                                      | K42A             | 3.192                                         |
| 228 | <b><math>\alpha</math>-homodimer</b> | R41A/K42A        | 7.168                                         |
| 229 |                                      | E98R             | 8.04                                          |
| 230 |                                      | E98Q             | 3.393                                         |
| 231 |                                      | K101D            | 7.22                                          |
| 232 |                                      | R102E            | 5.587                                         |
| 233 |                                      | K101D/R102E      | 12.105                                        |
| 234 |                                      | E98A             | 3.831                                         |
| 235 |                                      | K101A            | 4.266                                         |
| 236 | R102A                                | 3.844            |                                               |
| 237 | K101A/R102A                          | 6.49             |                                               |

238  
239  
240  
241  
242  
243  
244  
245  
246  
247  
248  
249  
250  
251  
252  
253  
254  
255  
256  
257  
258  
259  
260  
261  
262  
263  
264  
265  
266  
267  
268  
269  
270  
271  
272  
273  
274  
275  
276  
277  
278  
279  
280  
281  
282  
283  
284  
285  
286  
287  
288  
289  
290  
291  
292  
293  
294  
295  
296  
297  
298  
299  
300  
301  
302  
303  
304  
305  
306  
307  
308  
309  
310  
311  
312  
313  
314  
315  
316  
317  
318  
319  
320  
321  
322  
323  
324  
325  
326  
327  
328  
329  
330  
331  
332  
333  
334  
335  
336  
337  
338  
339  
340  
341  
342  
343  
344  
345  
346  
347  
348  
349  
350  
351  
352  
353  
354  
355  
356  
357  
358  
359  
360  
361  
362  
363  
364  
365  
366  
367  
368  
369  
370  
371  
372  
373  
374  
375  
376  
377  
378  
379  
380  
381  
382  
383  
384  
385  
386  
387  
388  
389  
390  
391  
392  
393  
394  
395  
396  
397  
398  
399  
400  
401  
402  
403  
404  
405  
406  
407  
408  
409  
410  
411  
412  
413  
414  
415  
416  
417  
418  
419  
420  
421  
422  
423  
424  
425  
426  
427  
428  
429  
430  
431  
432  
433  
434  
435  
436  
437  
438  
439  
440  
441  
442  
443  
444  
445  
446  
447  
448  
449  
450  
451  
452  
453  
454  
455  
456  
457  
458  
459  
460  
461  
462  
463  
464  
465  
466  
467  
468  
469  
470  
471  
472  
473  
474  
475  
476  
477  
478  
479  
480  
481  
482  
483  
484  
485  
486  
487  
488  
489  
490  
491  
492  
493  
494  
495  
496  
497  
498  
499  
500

231 **Stabilities of the oncogenic K-Ras4B<sup>G12D</sup>-GTP  $\alpha$ - and  $\beta$ -**  
232 **homodimers**

233 During the simulations, we observed that both oncogenic K-Ras4B<sup>G12D</sup>-GTP  $\alpha$ - and  $\beta$ -  
234 homodimers are stable. As can be seen from the time-series of snapshots (**Fig 3**), no  
235 immediate dissociation of the dimers was monitored. However, we encountered large  
236 fluctuations in the Switch I and II regions during the simulations (**S1A Fig**). Of interest  
237 noticed for the oncogenic  $\beta$ -homodimer is that one of the K-Ras4B monomer yielded  
238 relatively larger fluctuations in the Switch I region than the other monomer. Large  
239 fluctuations of the Switch I loop are eminent when compared to the mutant  $\beta$ -homodimer (**S2**  
240 **Fig**). The fluctuations induce conformational changes of the Switch I loop, which oscillates  
241 between the closed and open catalytic site conformations. Similar observations were reported

242 for both wild-type and mutant H-Ras-GTP in the open and closed states using the MD  
243 simulations and crystallography experiments [52].

244

245 **Fig 3. Simulated systems of the oncogenic K-Ras4B<sup>G12D</sup> dimer complex.** Time-series of  
246 the oncogenic  $\alpha$ -homodimer (upper row), and that of the oncogenic  $\beta$ -homodimer.

247

248 For the oncogenic  $\alpha$ -homodimer, the salt bridge interactions are a major driving force  
249 in stabilizing the dimer complex. Immediate drifting away of the proteins from the complex  
250 can be prevented due to strong salt-bridge interactions between the K-Ras4B monomers. To  
251 identify intermolecular interacting residue pairs that are responsible for the dimeric  
252 association, the atomistic interactions at the interfaces were investigated. We observed  
253 significant intermolecular salt bridge interactions at the interfaces (**Table 3**). For the  
254 oncogenic  $\alpha$ -homodimer, E107-K101 and K128-E91 are the most frequently observed pairs of  
255 the salt bridge interaction at the interface. For the oncogenic  $\beta$ -homodimer, D37-K41 and  
256 D33-K42 are the most frequently observed pairs of the salt bridge interactions at the interface.  
257 In addition to the salt bridge formation, the intermolecular backbone hydrogen bonds (H-  
258 bonds) add to the stability of the  $\beta$ -homodimer. The H-bond interactions formed by the  
259 interacting pairs, S39-S39 and D37-K41, strongly retain the  $\beta$ -sheet dimer interface. These  
260 residues constitute the shifted  $\beta$ -sheet extension interface, consistent with previous  
261 observations [19, 21].

262

263

264

265

266

267 **Table 3. Salt bridge formations throughout the simulations.**

| Dimer systems                                             | Salt bridge interacting pairs<br>M1 - M2 (%)                                     |
|-----------------------------------------------------------|----------------------------------------------------------------------------------|
| <b>K-Ras4B<sup>G12D</sup><br/>α-homodimer</b>             | E107 - K101 (34.8)<br>K128 - E91 (38.3)<br>E98 - K101 (18.5)<br>K101 - E98 (6.3) |
| <b>K-Ras4B<sup>G12D</sup><br/>β-homodimer</b>             | D38 - K42 (51.2)<br>K42 - D33 (47.5)<br>E37 - R41 (41.9)<br>D33 - K42 (40.9)     |
| <b>K-Ras4B<sup>G12D/K101D/R102E</sup><br/>α-homodimer</b> | D126 - K128 (7.6)<br>K128 - D126 (6.6)<br>E91 - R135 (7.0)<br>R135 - E91(6.0)    |

278 Salt bridge formations throughout the simulation trajectories for the oncogenic  
279 K-Ras4B<sup>G12D</sup> α- and β-homodimers, and for the mutant K-Ras4B<sup>G12D/K101D/R102E</sup>  
280 α-homodimer. M1 and M2 denotes monomer 1 and 2, respectively.

281

## 282 **Comparisons of oncogenic K-Ras4B<sup>G12D</sup> dimers with mutant K-** 283 **Ras4B<sup>G12D/K101D/R102E</sup> and K-Ras4B<sup>G12D/R41E/K42D</sup> dimers**

284 To investigate stabilities of the K-Ras4B dimeric systems, we calculated the center of  
285 mass distance between two monomers in each dimer (**Fig 4**). For the oncogenic α-homodimer,  
286 the center of mass distance is measured ~35 Å, although large fluctuations in the distance are  
287 observed at  $t \sim 130$  ns. The fluctuations occur due to rearrangement of the helices at the dimer  
288 interface, resulting that the dimer slightly alters the interface, shifting to an asymmetric helical  
289 interface (**Fig. 3**). In contrast, the oncogenic β-homodimer stably maintains the center of mass  
290 distance ~33 Å throughout the simulation. For the mutant α-homodimer, we also observed  
291 large fluctuations in the distance at  $t \sim 230$  ns due to rearrangement of the allosteric helices.  
292 Similar to the oncogenic α-homodimer, the mutant α-homodimer also yields the asymmetric  
293 helical interface, retaining the dimeric association. However, for the mutant β-homodimer, we

294 observed that the dimer is not stable, separated into two monomers at the early stage of the  
295 simulations. The separation is caused by the electrostatic repulsions between  $\beta$ 2 strands,  
296 exerted from the mutated residues with opposite charges. After the separation, each separated  
297 monomer is stable, exhibiting less fluctuations in the Switch I and II regions as compared to  
298 those in the dimeric complex (**S1 Fig**).

299

300 **Fig 4. The center of mass distance.** Time series of the center of mass distance between two  
301 monomers for the oncogenic K-Ras4B<sup>G12D</sup>  $\alpha$ - and  $\beta$ -homodimers (upper panels), and that for  
302 the mutant K-Ras4B<sup>G12D/K101D/R102E</sup>  $\alpha$ -homodimer and K-Ras4B<sup>G12D/R41E/K42D</sup>  $\beta$ -homodimer  
303 (lower panels).

304

305 To identify intermolecular interacting residue pairs for the mutant  $\alpha$ -homodimer, we  
306 also examined the atomistic interactions at the interfaces (**Table 3**). We only investigated the  
307 residue pairs for the mutant  $\alpha$ -homodimer, since the mutant  $\beta$ -homodimer is separated, thus  
308 no interface residue pairs. The residue pairs for the salt bridge interactions are different  
309 compared to those in the oncogenic  $\alpha$ -homodimer. This suggests that helices are aligned in a  
310 different way at the interface, although both  $\alpha$ -homodimers favor the similar asymmetric  
311 helical interface. We found that 6 % of the residues are observed to be conserved 90% of the  
312 time, 13% of the residues are observed to be conserved 70% of the time for the mutant  $\alpha$ -  
313 homodimer.

314

## 315 **Clustering analysis for K-Ras4B homodimers**

316 To provide the best representative model of K-Ras4B dimer complexes, we clustered  
317 the ensembles of the conformations over the simulation trajectories (**Fig 5**). We obtained 5  
318 representative clusters for the oncogenic  $\alpha$ -homodimer. The first and second clusters with

319 34.0% and 14.0% populations, respectively, exhibit the similar dimeric interactions using the  
320  $\alpha 3$ - $\alpha 4$ - $\alpha 5$  helices from one monomer and the  $\alpha 2$ - $\alpha 3$  helices from the other monomer. Unlike  
321 the conformations from two highly populated clusters, the representative conformations from  
322 next three less populated clusters are similar to each other. The initial dimeric interface is  
323 formed by the symmetric  $\alpha 3$ - $\alpha 4$ / $\alpha 3$ - $\alpha 4$  helical alignment. During the course of the simulation,  
324 the symmetric helical alignment (with 31% population) is steadily converted to an asymmetric  
325  $\alpha 3$ - $\alpha 4$ - $\alpha 5$ / $\alpha 2$ - $\alpha 3$  helical alignment (with 48% population) (**S3 Fig**). The dimer adopts the  
326 asymmetric helical alignment using the  $\alpha 3$ - $\alpha 4$ / $\alpha 3$  and  $\alpha 5$ / $\alpha 2$  interfaces. The asymmetric  $\alpha 3$ -  
327  $\alpha 4$ / $\alpha 3$  helical interface is commonly observed in the K-Ras4B dimer with the allosteric lobe  
328 interface [21, 22]. The occurrence frequency of residue pairs that contributes interface  
329 formation in the oncogenic  $\alpha$ -homodimer are given in **S1 Table**. We also obtained 5  
330 representative clusters for the oncogenic  $\beta$ -homodimer, and found that unlike the  $\alpha$ -  
331 homodimer, the representative conformations from each cluster are similar to each other. The  
332 oncogenic  $\beta$ -homodimer retains the shifted  $\beta$ -sheet extension interface with relatively high  
333 affinity. We summarized the occurrence frequency of residue pairs that contributes interface  
334 formation in the oncogenic  $\beta$ -homodimer in **S2 Table**.

335

336 **Fig 5. Clustering analysis.** Snapshots and populations of the five representatives for the most  
337 populated conformational clusters for the oncogenic K-Ras4B<sup>G12D</sup>  $\alpha$ -homodimer (left column)  
338 and  $\beta$ -homodimer (middle column). The same for the mutant K-Ras4B<sup>G12D/K101D/R102E</sup>  $\alpha$ -  
339 homodimer (right column).

340

341 For the mutant  $\alpha$ -homodimer, we provide 5 clusters representing the best models for  
342 the mutant dimeric complex (**Fig 5**). No clusters for the mutant  $\beta$ -homodimer were obtained  
343 due to separation. Similar to the oncogenic  $\alpha$ -homodimer, the mutant  $\alpha$ -homodimer also

344 adopts the asymmetric helical alignment using the  $\alpha 3$ - $\alpha 4$ / $\alpha 3$  interface, abandoning the initial  
345 symmetric  $\alpha 3$ - $\alpha 4$ / $\alpha 3$ - $\alpha 4$  interface (**S4 Fig**). However, no  $\alpha 5$ / $\alpha 2$  interface was observed. The  
346 representative clusters were sampled during the simulation in the order of their emergences,  
347 cluster 4  $\rightarrow$  cluster 5  $\rightarrow$  cluster 1  $\rightarrow$  cluster 2  $\rightarrow$  cluster 3.

348

## 349 **Binding energies for oncogenic K-Ras4B<sup>G12D</sup> dimers**

350 The binding free energies of the dimer systems were calculated by using the MM-  
351 GBSA method. The binding free energy of the oncogenic  $\alpha$ -homodimer seems to be less  
352 favorable than the oncogenic  $\beta$ -homodimer (**Table 4**), suggesting that the allosteric lobe  
353 interface is not strong as the effector lobe interface, consistent with the wild-type case [19,  
354 21]. The  $\alpha$ -homodimer undergoes rearrangements of the allosteric helical interactions during  
355 the simulations, contributing to the enthalpy changes for individual clusters. We observed  
356 that, indeed each cluster has considerably different enthalpy changes for the oncogenic  $\alpha$ -  
357 homodimer. These are specifically -54.8, -50.9, -44.1, -40.2 and -65.3 kcal/mol for cluster 1-  
358 5, respectively. Therefore, the initial complex was the most favorable one, then the energy  
359 increased and after 150 ns, it became stable for clusters 1 and 2 (**S5 Fig**). In contrast, the  
360 enthalpy change is relatively stable for the oncogenic  $\beta$ -homodimer.

361

362 **Table 4. MM-GBSA results for the oncogenic K-Ras4B<sup>G12D</sup> dimer complexes.**

| <b>K-Ras4B<sup>G12D</sup></b>        | <b><math>\Delta H</math> (kcal/mol)</b> | <b><math>-T\Delta S</math> (kcal/mol)</b> | <b><math>\Delta G</math> (kcal/mol)</b> |
|--------------------------------------|-----------------------------------------|-------------------------------------------|-----------------------------------------|
| <b><math>\alpha</math>-homodimer</b> | -49.6 $\pm$ 13.7                        | 71.0                                      | 22.1                                    |
| <b><math>\beta</math>-homodimer</b>  | -68.1 $\pm$ 8.2                         | 75.9                                      | 7.8                                     |

363

364

## 366 **Possible higher order complexes for the alpha control**

367 K-Ras4B forms a functional dimer through the allosteric lobe interface. The  $\alpha 3$ - $\alpha 4$ / $\alpha 3$ -  
368  $\alpha 4$  helical alignment was defined as a major K-Ras4B allosteric lobe interface, while the  $\alpha 4$ -  
369  $\alpha 5$ / $\alpha 4$ - $\alpha 5$  helical alignment was appeared to be a minor interface [19, 21, 22, 53]. We provide  
370 some possible higher order homo-complexes for the oncogenic  $\alpha$ -homodimers (**Fig 6, S6 Fig**).  
371 We used the cluster representatives from the **Fig 5** (left column) as well as the minor  $\alpha$ -  
372 homodimer structure using the  $\alpha 4$ - $\alpha 5$ / $\alpha 4$ - $\alpha 5$  helical interface from previous studies [19]. We  
373 construct some possible trimers, tetramers, and pentamers, which are obtained by the  
374 superimposition of the dimers. We selected the complex structures that have the C-termini  
375 facing to the same surface, where each monomer will be bound to the membrane. All homo-  
376 complexes were generated by HSYMDOCK web-server [54]. As an initial input, we used  
377 representative 1 and representative 3, 47.6% of all visited conformations. Representative 2 is  
378 very similar to representative 1 (iRMSD < 1.614 Å); therefore, we did not consider it.  
379 Interface residues are obtained by HotRegion web-server [41], and corresponding helices  
380 were indicated. According to our results, trimer, tetramer, and pentamer formation occur via  
381  $\alpha 3$ - $\alpha 4$  and  $\alpha 5$  interfaces, exposing the effector binding sites. When we tried to form the higher  
382 order oligomers starting with the cluster representatives of the mutant  $\alpha$ -homodimers, we  
383 could not manage to obtain regular trimers, tetramers or pentamers. This might suggest that  
384 although the mutant  $\alpha$ -homodimer is plausible, it is not possible to construct higher order  
385 structures from them.

386

387 **Fig 6. The predicted higher order homo-complexes.** The trimer, tetramer and pentamer  
388 complexes using symmetry operations with the oncogenic K-Ras4B<sup>G12D</sup>  $\alpha$ -homodimer.

389

390



## 391 Discussion

392 Monomeric Ras can bind Raf, however Raf should act as a dimer, which can be  
393 facilitated by Ras dimerization [18, 21]. Using *in silico* and *in vitro* methods, we previously  
394 demonstrated that wild-type K-Ras4B in the GTP-bound state can dimerize through two  
395 major interfaces involving the allosteric and effector lobe interfaces [19, 21, 22]. The  
396 allosteric lobe interface yields a functional  $\alpha$ -homodimer, since the effectors can bind to the  
397 exposed effector binding site. In contrast, the effector lobe interface produces a nonfunctional  
398  $\beta$ -homodimer, since the dimer shares the same interface with the effectors. K-Ras4B favors to  
399 form a major  $\alpha$ -homodimer using  $\alpha 3$  and  $\alpha 4$  helices at the allosteric lobe, but the population  
400 of a dimer involving  $\alpha 4$  and  $\alpha 5$  helices is low. A major K-Ras4B  $\beta$ -homodimer contains a  
401 shifted  $\beta$ -sheet extension between  $\beta 2$  strands. The  $\beta$ -homodimer exhibits relatively higher  
402 affinity than the  $\alpha$ -homodimer. A minor K-Ras4B  $\beta$ -homodimer reveals a  $\beta$ -sandwich  
403 interface involving side-chain interactions of  $\beta 1$ ,  $\beta 2$ , and  $\beta 3$  strands. The  $\beta$ -sandwich interface  
404 emerged from the exact  $\beta$ -sheet alignment due to H-bonds mismatch between  $\beta 2$  strands [19,  
405 21]. A similar nonfunctional  $\beta$ -sandwich dimer stabilized by two BI-2852 molecules was  
406 recently discovered [35-37].

407 Our oncogenic K-Ras4B<sup>G12D</sup>  $\alpha$ -homodimer retains the dimeric association. The  
408 oncogenic  $\alpha$ -homodimer favors an asymmetric helical alignment using the  $\alpha 3$ - $\alpha 4$ / $\alpha 3$  and  
409  $\alpha 5$ / $\alpha 2$  interfaces, abandoning the symmetric  $\alpha 3$ - $\alpha 4$ / $\alpha 3$ - $\alpha 4$  helical alignment. We observed that  
410 the asymmetric  $\alpha 3$ - $\alpha 4$ / $\alpha 3$  helical interface is popular among K-Ras4B dimers with the  
411 allosteric lobe interface [21, 22]. The oncogenic  $\beta$ -homodimer is relatively stable during the  
412 simulations, preserving the same interface as observed in the wild-type simulations [19, 21].  
413 The mutant Ras4B<sup>G12D/K101D/R102E</sup>  $\alpha$ -homodimer marginally preserves the allosteric lobe  
414 interface using the similar asymmetric  $\alpha 3$ - $\alpha 4$ / $\alpha 3$  helical interface as observed for the  
415 oncogenic case, while the mutant K-Ras4B<sup>G12D/R41E/K42D</sup>  $\beta$ -homodimer is dissociated at the

416 early in the simulations. The asymmetry in the conformation of functional Ras dimer may  
417 help to deduce the shape of the nanoclusters, the higher order homo-complexes, suggesting  
418 that it is less likely linear but more likely curved or circular. Using the HSYMDOCK web-  
419 server [54], we delineate K-Ras4B nanoclusters as the trimeric, tetrameric, pentameric shapes  
420 using the oncogenic K-Ras4B<sup>G12D</sup>  $\alpha$ -homodimer interface. However, no higher order homo-  
421 complex is predicted for the mutant Ras4B<sup>G12D/K101D/R102E</sup>  $\alpha$ -homodimer due to the weak  
422 dimeric interface.

423         The  $\beta$ -homodimer with the effector lobe interface overlaps with the binding region of  
424 its effectors, whereas the  $\alpha$ -homodimer with the allosteric lobe helical interface is believed to  
425 promote Ras dimerization [20, 22] and thus Raf dimerization. Recent site-directed  
426 mutagenesis and cellular localization experiments showed that K101D/R102E double  
427 mutations on the allosteric lobe of K-Ras4B<sup>G12D</sup> reduce dimerization at the plasma membrane  
428 and slightly decrease downstream phosphorylated extracellular signal-regulated kinase (ERK)  
429 levels [20]. In contrast, R41E/K42D double mutations on the effector lobe retain dimerization  
430 at the plasma membrane but completely abrogate ERK phosphorylation. Both double  
431 mutations increase Akt phosphorylation. The altered phosphorylation levels on the  
432 downstream effectors are composite results of the mutations affecting the Ras dimerization  
433 and the HVR dynamics interrupting the Ras interaction at the plasma membrane. In line with  
434 the experiments, the mutant K-Ras4B<sup>G12D/K101D/R102E</sup>  $\alpha$ -homodimer exhibits relatively weak  
435 dimer interface in solution, and thus reducing dimerization and decreasing pERK levels at the  
436 plasma membrane. On the other hand, the mutant K-Ras4B<sup>G12D/R41E/K42D</sup>  $\beta$ -homodimer is  
437 unstable in solution, but the experiments verified dimerization at the plasma membrane. This  
438 indicates that the mutant avoids unfavorable effector lobe interface, instead promoting  
439 dimerization through the allosteric lobe interface at the membrane. However, it was observed

440 that the mutant K-Ras4B<sup>G12D/R41E/K42D</sup> mutant blocks ERK phosphorylation in the MAPK  
441 pathway, since it cannot activate Raf-1 [20].

442 Our simulations verified that the major effector lobe interface is made of a single state  
443 and the major allosteric lobe interface has several states. Although the effector lobe interface  
444 is more stable than the allosteric lobe interface, the functional dimeric interface is through the  
445 allosteric lobe interface containing  $\alpha 3$  and  $\alpha 4$  helices with the exposed effector binding sites  
446 for recruiting two Rafs to the plasma membrane [21, 22]. The multiple interfaces observed for  
447 the allosteric lobe interface might help to draw functional K-Ras4B nanoclusters.

448

## 449 **Acknowledgements**

450 This work has been supported by TUBITAK Research Grant No: 114M196. This project has  
451 been funded in whole or in part with federal funds from the National Cancer Institute,  
452 National Institutes of Health, under contract HHSN26120080001E. The content of this  
453 publication does not necessarily reflect the views or policies of the Department of Health and  
454 Human Services, nor does mention of trade names, commercial products, or organizations  
455 imply endorsement by the U.S. Government. This Research was supported [in part] by the  
456 Intramural Research Program of the NIH, National Cancer Institute, Center for Cancer  
457 Research. Computations have been performed at the high-performance center, Koc University  
458 and at the high-performance computational facilities of the Biowulf PC/Linux cluster at the  
459 National Institutes of Health, Bethesda, MD (<https://hpc.nih.gov/>).

460

## 461 **Author Contributions**

462 K.K. and M.E.O. performed the molecular dynamics studies. K.K. analysed data, prepared  
463 tables and figures. H.J. guided the simulations. R.N., H.J. A.G. and O.K. designed and  
464 conceptualized the project. H.J., K.K., M.E.O., O.K. and A.G. performed the article writing.

465 H.J, and O.K. made critical revisions and approved final version. All of the authors reviewed  
466 and approved the final manuscript.

467

## 468 **References**

- 469 1. Lu S, Jang H, Muratcioglu S, Gursoy A, Keskin O, et al. (2016) Ras Conformational  
470 Ensembles, Allostery, and Signaling. *Chem Rev* 116(11):6607-6665.  
471 <https://10.1021/acs.chemrev.5b00542> PMID: 26815308
- 472 2. Simanshu DK, Nissley DV, McCormick F (2017) RAS Proteins and Their Regulators  
473 in Human Disease. *Cell* 170(1):17-33. <https://10.1016/j.cell.2017.06.009> PMID:  
474 28666118
- 475 3. Stanley RJ, Thomas GM (2016) Activation of G Proteins by Guanine Nucleotide  
476 Exchange Factors Relies on GTPase Activity. *PLoS One* 11(3):e0151861.  
477 <https://10.1371/journal.pone.0151861> PMID: 26986850
- 478 4. Bos JL, Rehmann H, Wittinghofer A (2007) GEFs and GAPs: critical elements in the  
479 control of small G proteins. *Cell* 129(5):865-877. <https://10.1016/j.cell.2007.05.018>  
480 PMID: 17540168
- 481 5. Corbett KD, Alber T (2001) The many faces of Ras: recognition of small GTP-binding  
482 proteins. *Trends Biochem Sci* 26(12):710-716. [https://10.1016/s0968-0004\(01\)01974-](https://10.1016/s0968-0004(01)01974-0)  
483 [0](https://10.1016/s0968-0004(01)01974-0) PMID: 11738594
- 484 6. Vetter IR, Wittinghofer A (2001) The guanine nucleotide-binding switch in three  
485 dimensions. *Science* 294(5545):1299-1304. <https://10.1126/science.1062023> PMID:  
486 11701921
- 487 7. Wittinghofer A, Pai EF (1991) The structure of Ras protein: a model for a universal  
488 molecular switch. *Trends Biochem Sci* 16(10):382-387. [https://10.1016/0968-](https://10.1016/0968-0004(91)90156-p)  
489 [0004\(91\)90156-p](https://10.1016/0968-0004(91)90156-p) PMID: 1785141
- 490 8. Herrmann C, Horn G, Spaargaren M, Wittinghofer A (1996) Differential interaction of  
491 the ras family GTP-binding proteins H-Ras, Rap1A, and R-Ras with the putative  
492 effector molecules Raf kinase and Ral-guanine nucleotide exchange factor. *J Biol*  
493 *Chem* 271(12):6794-6800. <https://10.1074/jbc.271.12.6794> PMID: 8636102
- 494 9. Hobbs GA, Der CJ, Rossman KL (2016) RAS isoforms and mutations in cancer at a  
495 glance. *J Cell Sci* 129(7):1287-1292. <https://10.1242/jcs.182873> PMID: 26985062
- 496 10. Johnson CW, Reid D, Parker JA, Salter S, Knihtila R, et al. (2017) The small GTPases  
497 K-Ras, N-Ras, and H-Ras have distinct biochemical properties determined by  
498 allosteric effects. *J Biol Chem* 292(31):12981-12993.  
499 <https://10.1074/jbc.M117.778886> PMID: WOS:000407220100026
- 500 11. Parker JA, Mattos C (2015) The Ras-Membrane Interface: Isoform-specific  
501 Differences in The Catalytic Domain. *Mol Cancer Res* 13(4):595-603.  
502 <https://10.1158/1541-7786.MCR-14-0535> PMID: 25566993
- 503 12. Forbes SA, Bindal N, Bamford S, Cole C, Kok CY, et al. (2011) COSMIC: mining  
504 complete cancer genomes in the Catalogue of Somatic Mutations in Cancer. *Nucleic*  
505 *Acids Res* 39(Database issue):D945-950. <https://10.1093/nar/gkq929> PMID:  
506 20952405
- 507 13. Prior IA, Lewis PD, Mattos C (2012) A comprehensive survey of Ras mutations in  
508 cancer. *Cancer Res* 72(10):2457-2467. <https://10.1158/0008-5472.CAN-11-2612>  
509 PMID: 22589270

- 510 14. Nussinov R, Jang H, Tsai CJ, Cheng F (2019) Precision medicine review: rare driver  
511 mutations and their biophysical classification. *Biophys Rev* 11(1):5-19.  
512 <https://10.1007/s12551-018-0496-2> PMID: 30610579
- 513 15. Lu S, Jang H, Nussinov R, Zhang J (2016) The Structural Basis of Oncogenic  
514 Mutations G12, G13 and Q61 in Small GTPase K-Ras4B. *Sci Rep* 6:21949.  
515 <https://10.1038/srep21949> PMID: 26902995
- 516 16. Pantsar T, Rissanen S, Dauch D, Laitinen T, Vattulainen I, et al. (2018) Assessment of  
517 mutation probabilities of KRAS G12 missense mutants and their long-timescale  
518 dynamics by atomistic molecular simulations and Markov state modeling. *PLoS*  
519 *Comput Biol* 14(9):e1006458. <https://10.1371/journal.pcbi.1006458> PMID: 30199525
- 520 17. Inouye K, Mizutani S, Koide H, Kaziro Y (2000) Formation of the Ras dimer is  
521 essential for Raf-1 activation. *J Biol Chem* 275(6):3737-3740.  
522 <https://10.1074/jbc.275.6.3737> PMID: 10660519
- 523 18. Chen M, Peters A, Huang T, Nan XL (2016) Ras Dimer Formation as a New  
524 Signaling Mechanism and Potential Cancer Therapeutic Target. *Mini-Rev Med Chem*  
525 16(5):391-403. <https://10.2174/1389557515666151001152212> PMID:  
526 WOS:000369073100007
- 527 19. Muratcioglu S, Chavan TS, Freed BC, Jang H, Khavrutskii L, et al. (2015) GTP-  
528 Dependent K-Ras Dimerization. *Structure* 23(7):1325-1335.  
529 <https://10.1016/j.str.2015.04.019> PMID: 26051715
- 530 20. Muratcioglu S, Aydin C, Odabasi E, Ozdemir ES, Firat-Karalar EN, et al. (2020)  
531 Oncogenic K-Ras4B Dimerization Enhances Downstream Mitogen-activated Protein  
532 Kinase Signaling. *J Mol Biol* 432(4):1199-1215. <https://10.1016/j.jmb.2020.01.002>  
533 PMID: 31931009
- 534 21. Jang H, Muratcioglu S, Gursoy A, Keskin O, Nussinov R (2016) Membrane-  
535 associated Ras dimers are isoform-specific: K-Ras dimers differ from H-Ras dimers.  
536 *Biochem J* 473(12):1719-1732. <https://10.1042/BCJ20160031> PMID: 27057007
- 537 22. Jang H, Zhang M, Nussinov R (2020) The quaternary assembly of KRas4B with Raf-1  
538 at the membrane. *Comput Struct Biotechnol J* 18:737-748.  
539 <https://10.1016/j.csbj.2020.03.018> PMID: 32257057
- 540 23. Prakash P, Zhou Y, Liang H, Hancock JF, Gorfe AA (2016) Oncogenic K-Ras Binds  
541 to an Anionic Membrane in Two Distinct Orientations: A Molecular Dynamics  
542 Analysis. *Biophys J* 110(5):1125-1138. <https://10.1016/j.bpj.2016.01.019> PMID:  
543 26958889
- 544 24. Zhou Y, Hancock JF (2015) Ras nanoclusters: Versatile lipid-based signaling  
545 platforms. *Biochim Biophys Acta* 1853(4):841-849.  
546 <https://10.1016/j.bbamcr.2014.09.008> PMID: 25234412
- 547 25. Zhou Y, Liang H, Rodkey T, Ariotti N, Parton RG, et al. (2014) Signal integration by  
548 lipid-mediated spatial cross talk between Ras nanoclusters. *Mol Cell Biol* 34(5):862-  
549 876. <https://10.1128/MCB.01227-13> PMID: 24366544
- 550 26. Guldenhaupt J, Rudack T, Bachler P, Mann D, Triola G, et al. (2012) N-Ras forms  
551 dimers at POPC membranes. *Biophys J* 103(7):1585-1593.  
552 <https://10.1016/j.bpj.2012.08.043> PMID: 23062351
- 553 27. Lin WC, Iversen L, Tu HL, Rhodes C, Christensen SM, et al. (2014) H-Ras forms  
554 dimers on membrane surfaces via a protein-protein interface. *Proc Natl Acad Sci U S*  
555 *A* 111(8):2996-3001. <https://10.1073/pnas.1321155111> PMID: 24516166
- 556 28. Freeman AK, Ritt DA, Morrison DK (2013) The importance of Raf dimerization in  
557 cell signaling. *Small GTPases* 4(3):180-185. <https://10.4161/sgtp.26117> PMID:  
558 23985533

- 559 29. Nan X, Tamguney TM, Collisson EA, Lin LJ, Pitt C, et al. (2015) Ras-GTP dimers  
560 activate the Mitogen-Activated Protein Kinase (MAPK) pathway. *Proc Natl Acad Sci*  
561 *U S A* 112(26):7996-8001. <https://10.1073/pnas.1509123112> PMID: [26080442](https://pubmed.ncbi.nlm.nih.gov/26080442/)
- 562 30. Nan X, Collisson EA, Lewis S, Huang J, Tamguney TM, et al. (2013) Single-molecule  
563 superresolution imaging allows quantitative analysis of RAF multimer formation and  
564 signaling. *Proc Natl Acad Sci U S A* 110(46):18519-18524.  
565 <https://10.1073/pnas.1318188110> PMID: [24158481](https://pubmed.ncbi.nlm.nih.gov/24158481/)
- 566 31. Li S, Jang H, Zhang J, Nussinov R (2018) Raf-1 Cysteine-Rich Domain Increases the  
567 Affinity of K-Ras/Raf at the Membrane, Promoting MAPK Signaling. *Structure*  
568 26(3):513-525 e512. <https://10.1016/j.str.2018.01.011> PMID: [29429878](https://pubmed.ncbi.nlm.nih.gov/29429878/)
- 569 32. Sarkar S, Garcia AE (2019) Presence or absence of Ras-dimerization shows distinct  
570 kinetic signature in Ras-Raf interaction. *bioRxiv*:810150. <https://10.1101/810150>  
571 PMID:
- 572 33. Spencer-Smith R, Koide A, Zhou Y, Eguchi RR, Sha F, et al. (2017) Inhibition of  
573 RAS function through targeting an allosteric regulatory site. *Nat Chem Biol* 13(1):62-  
574 68. <https://10.1038/nchembio.2231> PMID: [27820802](https://pubmed.ncbi.nlm.nih.gov/27820802/)
- 575 34. Ambrogio C, Kohler J, Zhou ZW, Wang H, Paranal R, et al. (2018) KRAS  
576 Dimerization Impacts MEK Inhibitor Sensitivity and Oncogenic Activity of Mutant  
577 KRAS. *Cell* 172(4):857-868 e815. <https://10.1016/j.cell.2017.12.020> PMID:  
578 [29336889](https://pubmed.ncbi.nlm.nih.gov/29336889/)
- 579 35. Kessler D, Gmachl M, Mantoulidis A, Martin LJ, Zoephel A, et al. (2019) Drugging  
580 an undruggable pocket on KRAS. *Proc Natl Acad Sci U S A* 116(32):15823-15829.  
581 <https://10.1073/pnas.1904529116> PMID: [31332011](https://pubmed.ncbi.nlm.nih.gov/31332011/)
- 582 36. Kessler D, Gollner A, Gmachl M, Mantoulidis A, Martin LJ, et al. (2020) Reply to  
583 Tran et al.: Dimeric KRAS protein-protein interaction stabilizers. *Proc Natl Acad Sci*  
584 *U S A* 117(7):3365-3367. <https://10.1073/pnas.1921236117> PMID: [32047042](https://pubmed.ncbi.nlm.nih.gov/32047042/)
- 585 37. Tran TH, Alexander P, Dharmiah S, Agamasu C, Nissley DV, et al. (2020) The small  
586 molecule BI-2852 induces a nonfunctional dimer of KRAS. *Proc Natl Acad Sci U S A*  
587 117(7):3363-3364. <https://10.1073/pnas.1918164117> PMID: [32047043](https://pubmed.ncbi.nlm.nih.gov/32047043/)
- 588 38. Baspinar A, Cukuroglu E, Nussinov R, Keskin O, Gursoy A (2014) PRISM: a web  
589 server and repository for prediction of protein-protein interactions and modeling their  
590 3D complexes. *Nucleic Acids Res* 42(Web Server issue):W285-289.  
591 <https://10.1093/nar/gku397> PMID: [24829450](https://pubmed.ncbi.nlm.nih.gov/24829450/)
- 592 39. Ogmen U, Keskin O, Aytuna AS, Nussinov R, Gursoy A (2005) PRISM: protein  
593 interactions by structural matching. *Nucleic Acids Res* 33(Web Server issue):W331-  
594 336. <https://10.1093/nar/gki585> PMID: [15991339](https://pubmed.ncbi.nlm.nih.gov/15991339/)
- 595 40. Tuncbag N, Gursoy A, Nussinov R, Keskin O (2011) Predicting protein-protein  
596 interactions on a proteome scale by matching evolutionary and structural similarities at  
597 interfaces using PRISM. *Nat Protoc* 6(9):1341-1354. <https://10.1038/nprot.2011.367>  
598 PMID: [21886100](https://pubmed.ncbi.nlm.nih.gov/21886100/)
- 599 41. Cukuroglu E, Gursoy A, Keskin O (2012) HotRegion: a database of predicted hot spot  
600 clusters. *Nucleic Acids Res* 40(Database issue):D829-833. <https://10.1093/nar/gkr929>  
601 PMID: [22080558](https://pubmed.ncbi.nlm.nih.gov/22080558/)
- 602 42. Schymkowitz J, Borg J, Stricher F, Nys R, Rousseau F, et al. (2005) The FoldX web  
603 server: an online force field. *Nucleic Acids Res* 33(Web Server issue):W382-388.  
604 <https://10.1093/nar/gki387> PMID: [15980494](https://pubmed.ncbi.nlm.nih.gov/15980494/)
- 605 43. Muratcioglu S, Jang H, Gursoy A, Keskin O, Nussinov R (2017) PDEdelta Binding to  
606 Ras Isoforms Provides a Route to Proper Membrane Localization. *J Phys Chem B*  
607 121(24):5917-5927. <https://10.1021/acs.jpcc.7b03035> PMID: [28540724](https://pubmed.ncbi.nlm.nih.gov/28540724/)

- 608 44. Ozdemir ES, Jang H, Gursoy A, Keskin O, Li Z, et al. (2018) Unraveling the  
609 molecular mechanism of interactions of the Rho GTPases Cdc42 and Rac1 with the  
610 scaffolding protein IQGAP2. *J Biol Chem* 293(10):3685-3699.  
611 <https://10.1074/jbc.RA117.001596> PMID: 29358323
- 612 45. Ozdemir ES, Jang H, Gursoy A, Keskin O, Nussinov R (2018) Arl2-Mediated  
613 Allosteric Release of Farnesylated KRas4B from Shuttling Factor PDEdelta. *J Phys*  
614 *Chem B* 122(30):7503-7513. <https://10.1021/acs.jpcc.8b04347> PMID: 29961325
- 615 46. Huang J, Rauscher S, Nawrocki G, Ran T, Feig M, et al. (2017) CHARMM36m: an  
616 improved force field for folded and intrinsically disordered proteins. *Nat Methods*  
617 14(1):71-73. <https://10.1038/nmeth.4067> PMID: 27819658
- 618 47. Phillips JC, Braun R, Wang W, Gumbart J, Tajkhorshid E, et al. (2005) Scalable  
619 molecular dynamics with NAMD. *J Comput Chem* 26(16):1781-1802.  
620 <https://10.1002/jcc.20289> PMID: 16222654
- 621 48. Durell SR, Brooks BR, Ben-Naim A (1994) Solvent-Induced Forces between Two  
622 Hydrophilic Groups. *J Phys Chem* 98(8):2198-2202. <https://10.1021/j100059a038>  
623 PMID:
- 624 49. Brooks BR, Brooks CL, Mackerell AD, Nilsson L, Petrella RJ, et al. (2009)  
625 CHARMM: The Biomolecular Simulation Program. *J Comput Chem* 30(10):1545-  
626 1614. <https://10.1002/jcc.21287> PMID: WOS:000267269600001
- 627 50. Pettersen EF, Goddard TD, Huang CC, Couch GS, Greenblatt DM, et al. (2004) UCSF  
628 Chimera--a visualization system for exploratory research and analysis. *J Comput*  
629 *Chem* 25(13):1605-1612. <https://10.1002/jcc.20084> PMID: 15264254
- 630 51. Gohlke H, Case DA (2004) Converging free energy estimates: MM-PB(GB)SA  
631 studies on the protein-protein complex Ras-Raf. *J Comput Chem* 25(2):238-250.  
632 <https://10.1002/jcc.10379> PMID: 14648622
- 633 52. Shima F, Ijiri Y, Muraoka S, Liao J, Ye M, et al. (2010) Structural basis for  
634 conformational dynamics of GTP-bound Ras protein. *J Biol Chem* 285(29):22696-  
635 22705. <https://10.1074/jbc.M110.125161> PMID: 20479006
- 636 53. Prakash P, Sayyed-Ahmad A, Cho KJ, Dolino DM, Chen W, et al. (2017)  
637 Computational and biochemical characterization of two partially overlapping  
638 interfaces and multiple weak-affinity K-Ras dimers. *Sci Rep* 7(1):40109.  
639 <https://10.1038/srep40109> PMID: 28067274
- 640 54. Yan Y, Tao H, Huang SY (2018) HSYMDOCK: a docking web server for predicting  
641 the structure of protein homo-oligomers with Cn or Dn symmetry. *Nucleic Acids Res*  
642 46(W1):W423-W431. <https://10.1093/nar/gky398> PMID: 29846641  
643

## 644 **Supporting information**

645 **S1 Fig. The root-mean-square fluctuation (RMSF) of each system.** (A) The RMSF of the  
646 oncogenic K-Ras4B<sup>G12D</sup>  $\alpha$ - and  $\beta$ -homodimers, and (B) the same of the mutant K-  
647 Ras4B<sup>G12D/K101D/R102E</sup>  $\alpha$ -homodimer and K-Ras4B<sup>G12D/R41E/K42D</sup>  $\beta$ -homodimer.

648

649 **S2 Fig. Fluctuations in the Switch I regions.** Switch I regions of the oncogenic K-  
650 Ras4B<sup>G12D</sup>  $\beta$ -homodimer (left panel) as compared to that of the mutant K-Ras4B<sup>G12D/R41E/K42D</sup>  
651  $\beta$ -homodimer.

652 **S3 Fig. Highly populated clusters representing the conversion of interfaces.** Interfaces  
653 shifted from the symmetric  $\alpha 3$ - $\alpha 4$ / $\alpha 3$ - $\alpha 4$  helical alignment (with 31% population) towards the  
654 asymmetric helical alignment involving the  $\alpha 3$ - $\alpha 4$ / $\alpha 3$  and  $\alpha 5$ / $\alpha 2$  interfaces (with 48%  
655 population) for the oncogenic K-Ras4B<sup>G12D</sup>  $\alpha$ -homodimer.

656

657 **S4 Fig. Snapshots representing the conversion of interfaces.** Snapshots representing the  
658 conversion of interface from the symmetric  $\alpha 3$ - $\alpha 4$ / $\alpha 3$ - $\alpha 4$  helical alignment to the asymmetric  
659  $\alpha 3$ - $\alpha 4$ / $\alpha 3$  helical alignment for the mutant K-Ras4B<sup>G12D/K101D/R102E</sup>  $\alpha$ -homodimer (upper  
660 panels), and the dissociation of the mutant K-Ras4B<sup>G12D/R41E/K42D</sup>  $\beta$ -homodimer (lower  
661 panels).

662

663 **S5 Fig. Time series of the enthalpy changes,  $\Delta H$ , during the simulations for the**  
664 **oncogenic K-Ras4B<sup>G12D</sup>  $\alpha$ -homodimer (upper panel) and  $\beta$ -homodimer (lower panel).**

665

666 **S6 Fig. Some examples of the predicted higher order homo-complexes.** The trimer,  
667 tetramer and pentamer complexes using symmetry operations with the oncogenic K-  
668 Ras4B<sup>G12D</sup>  $\alpha$ -homodimer and the interface residues together with the secondary structure  
669 elements in these complexes are listed.

670

671



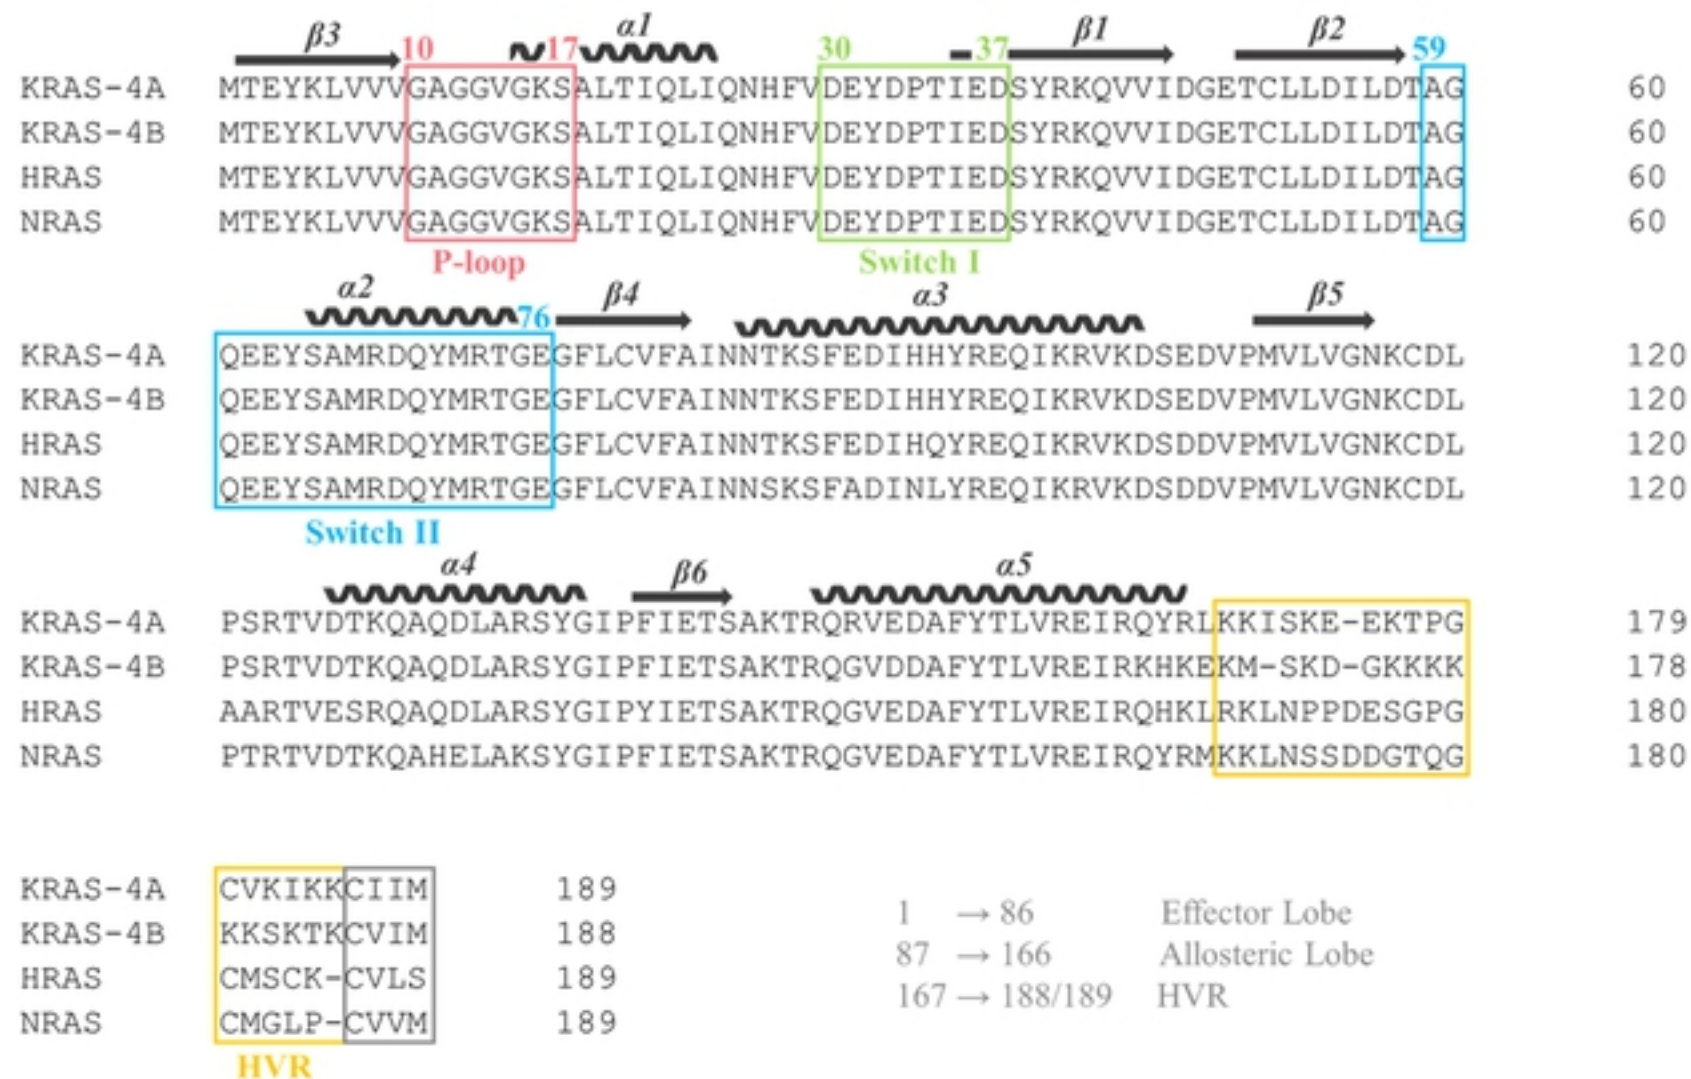

Figure 1

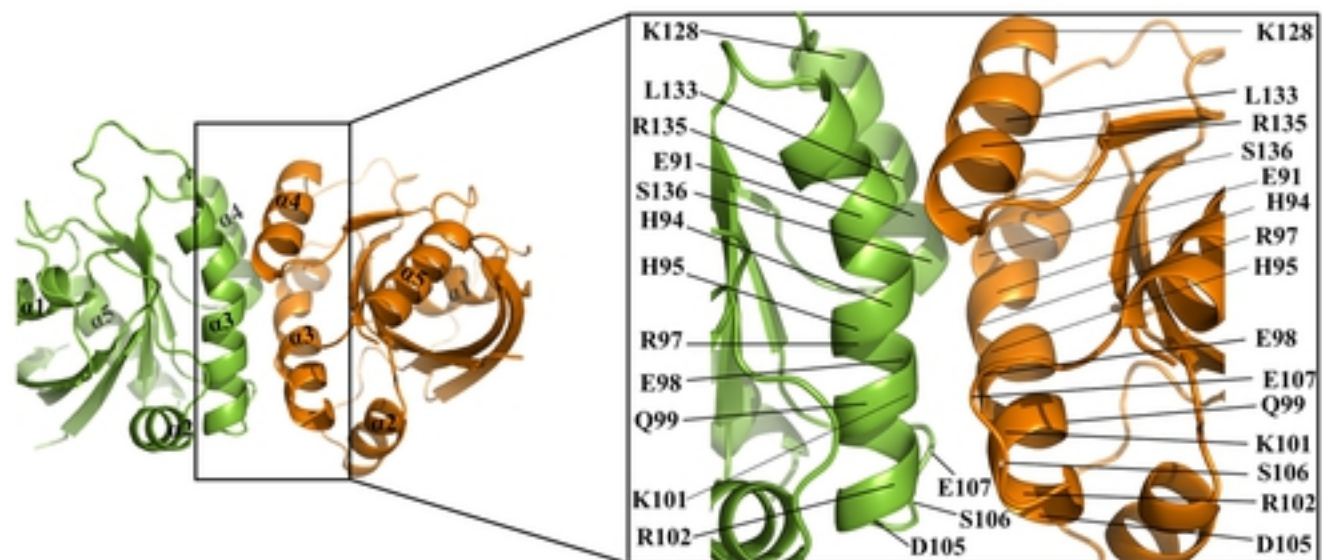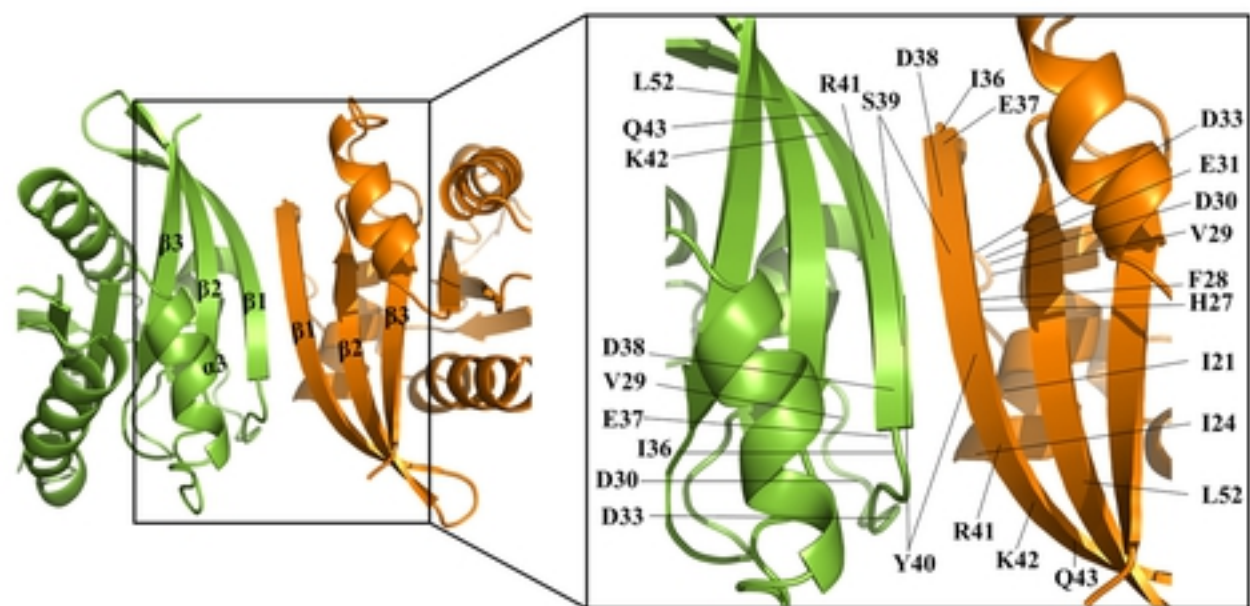

Figure 2

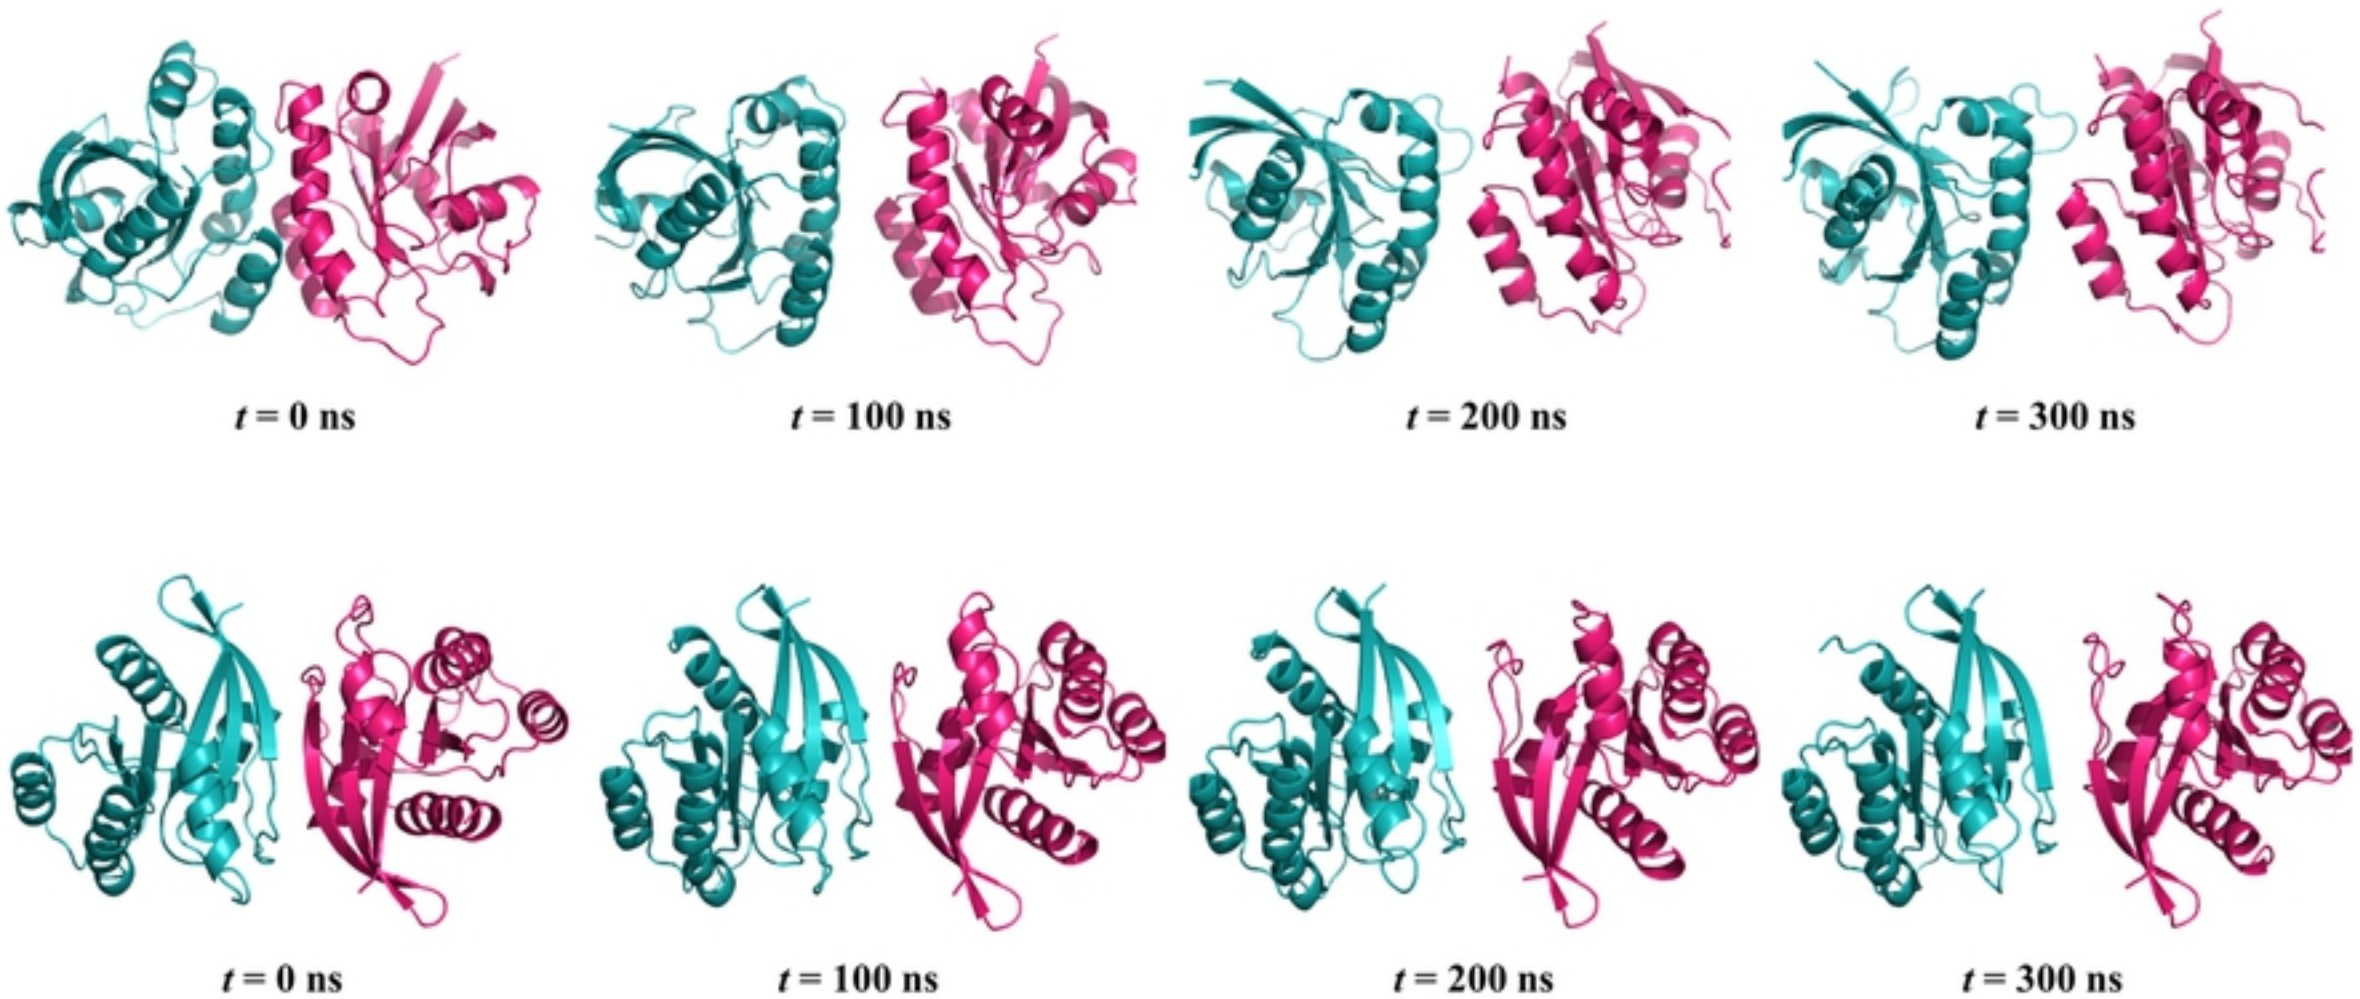

Figure 3

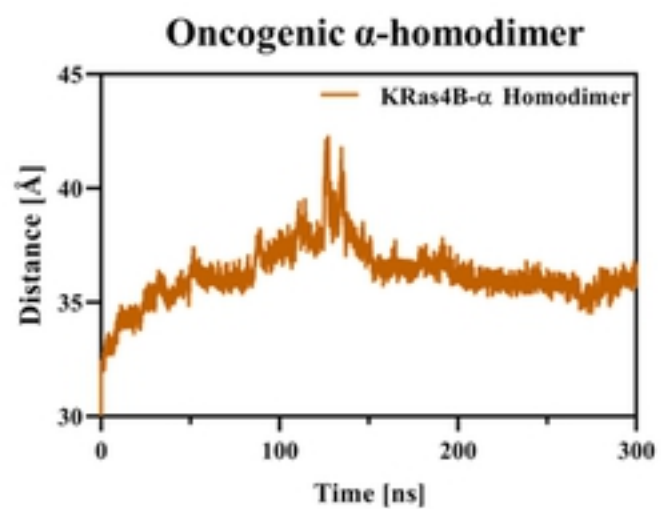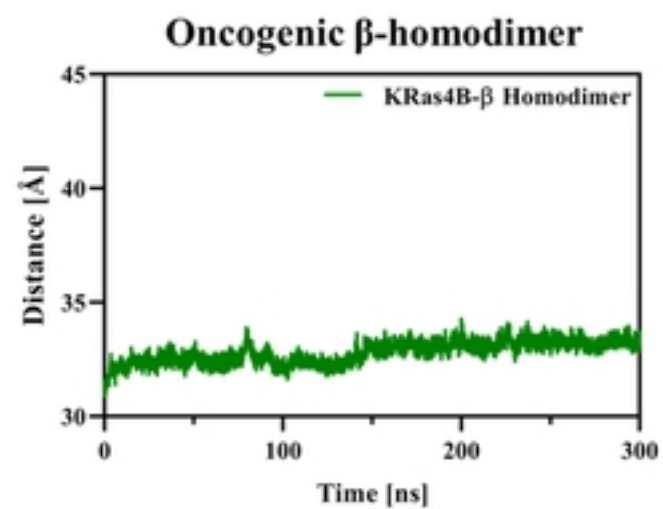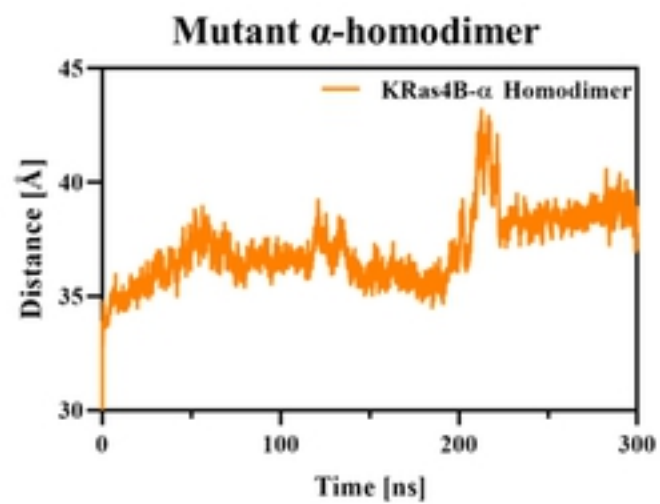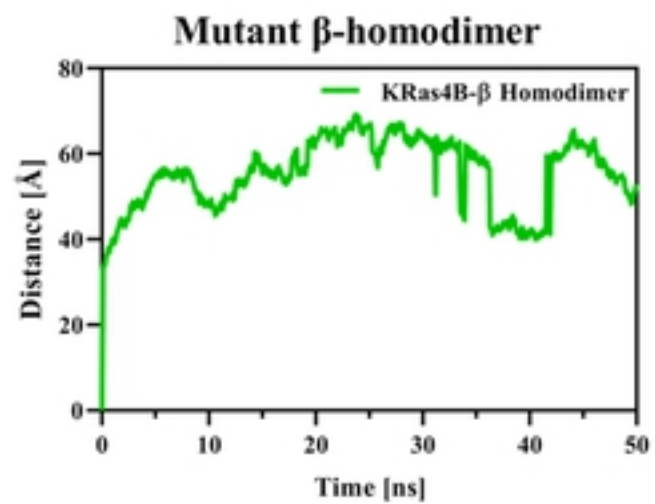

Figure 4

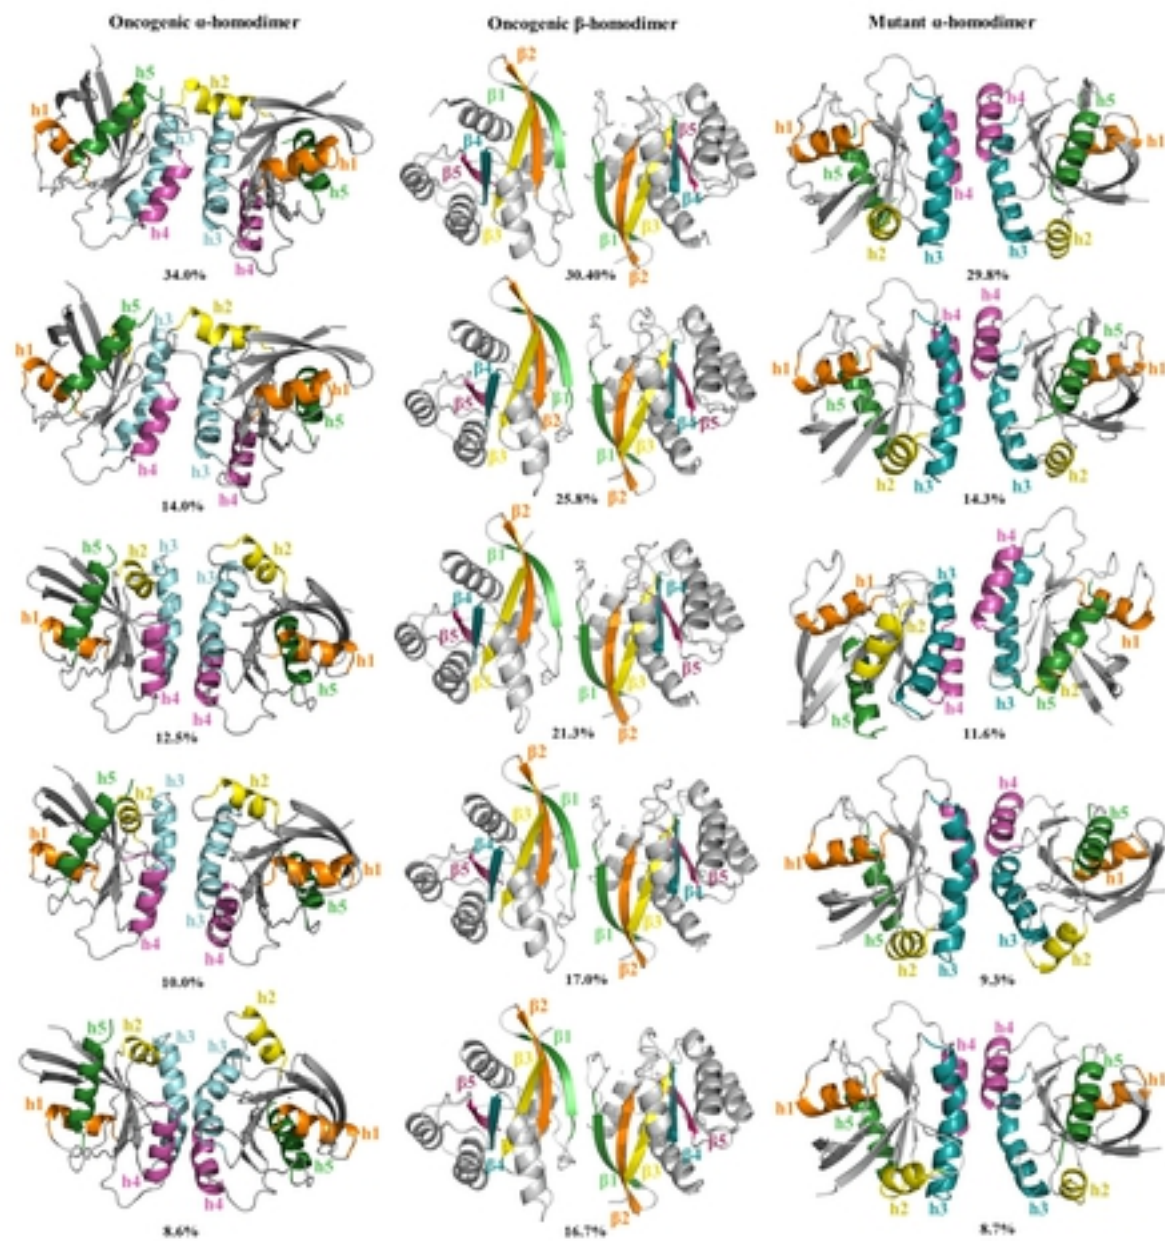

Figure 5

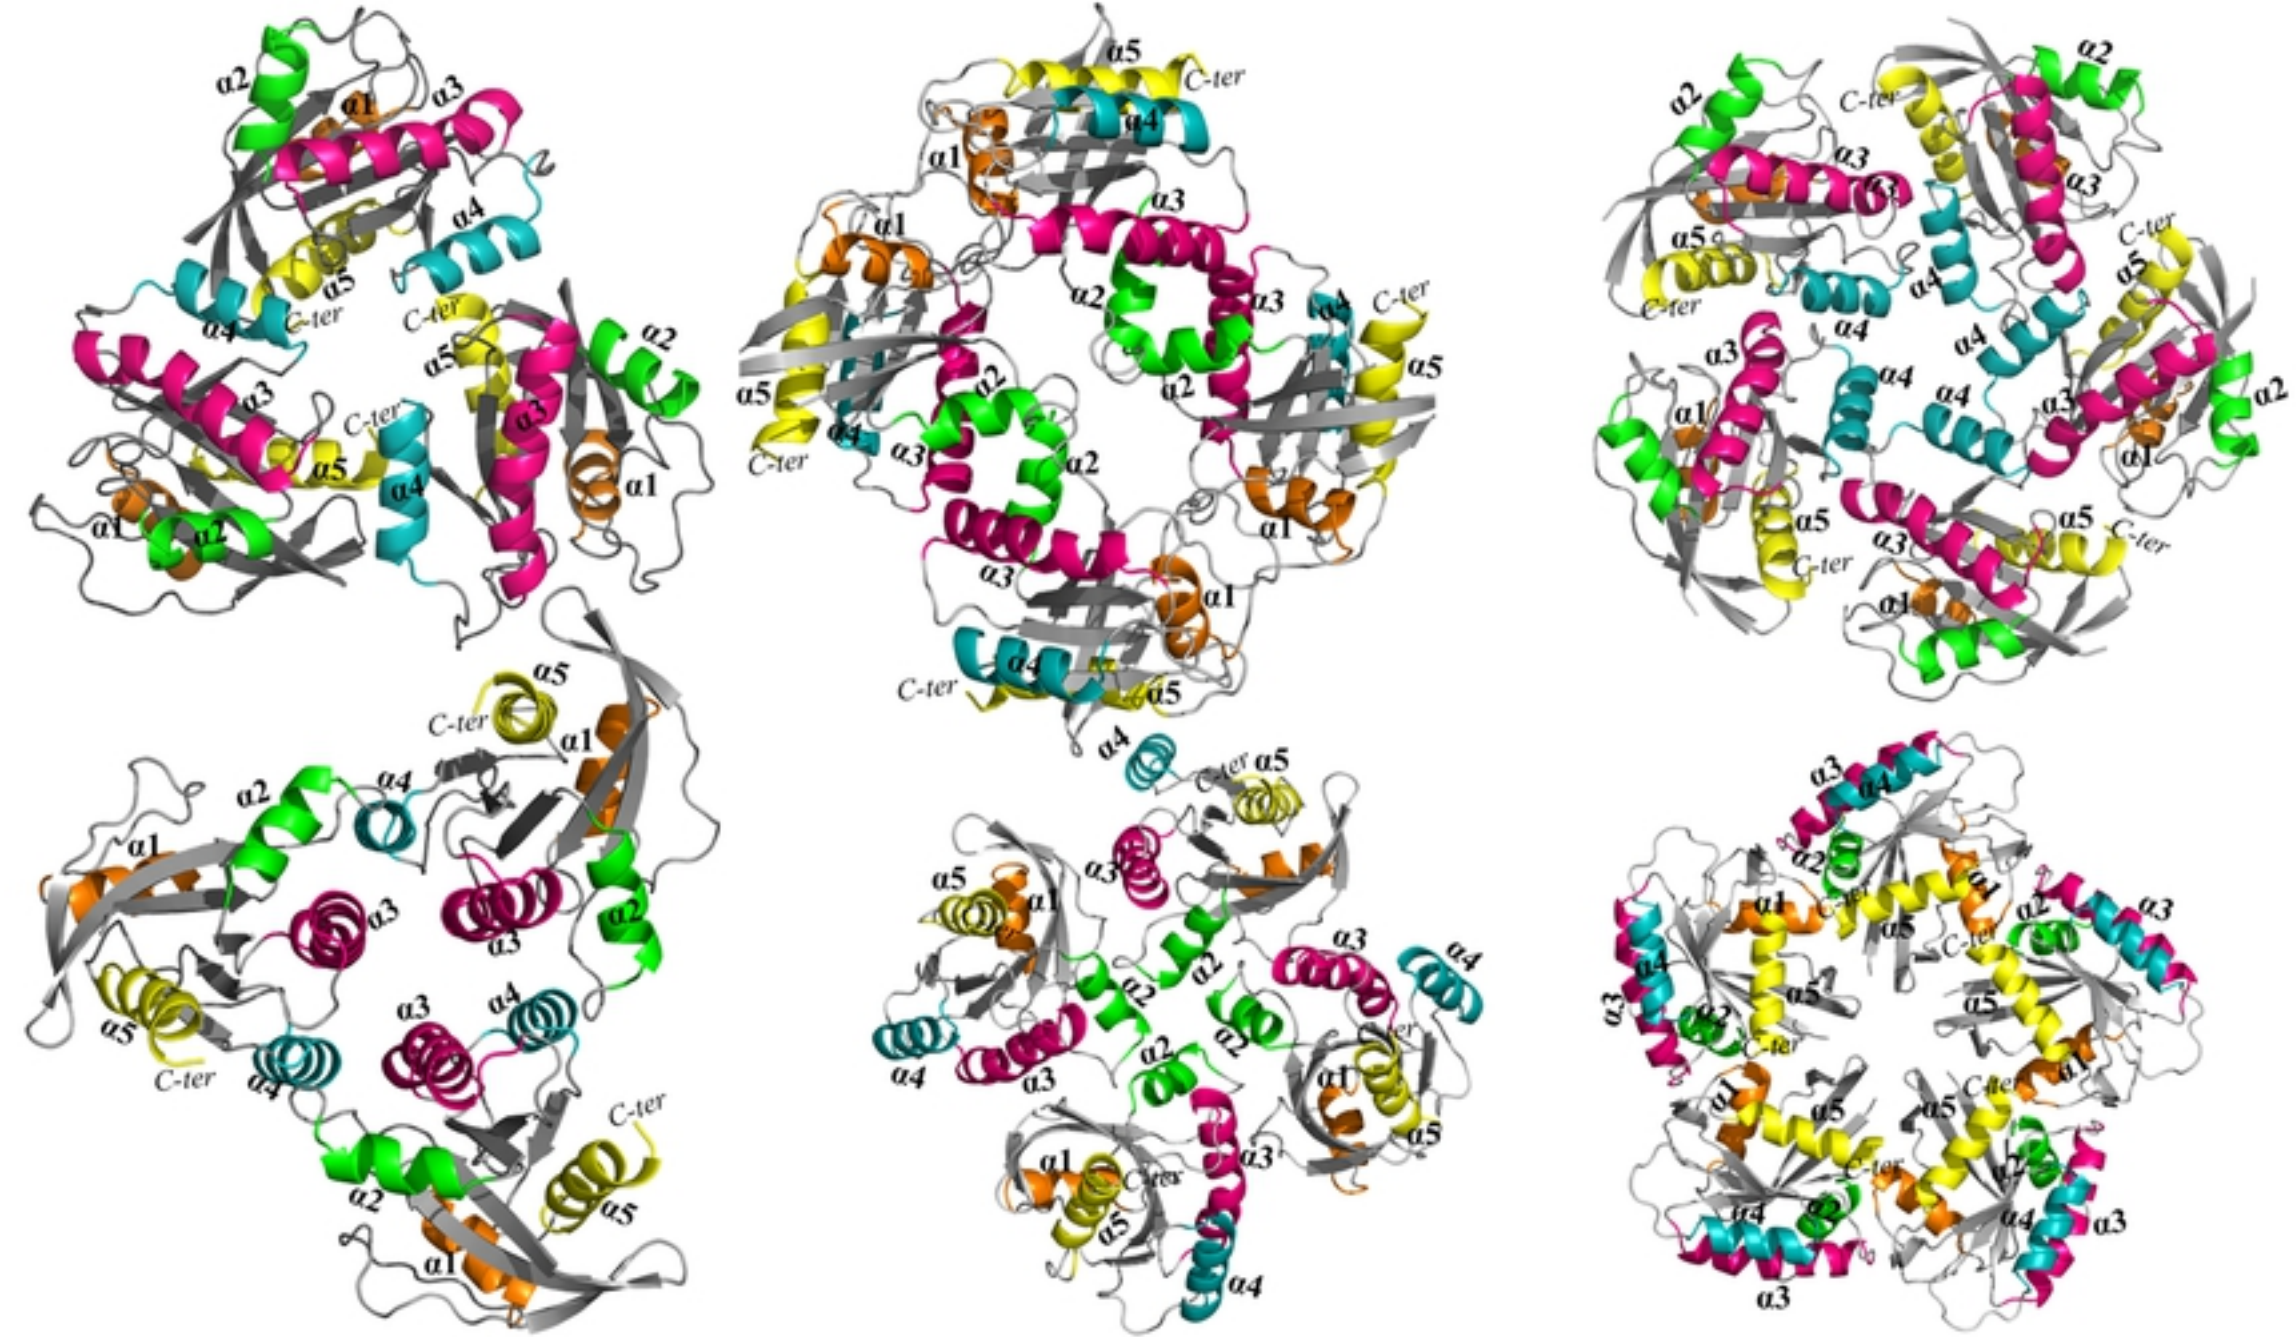

Figure 6
